# Supplementary material for: Assessing the Impact of Pollution on Urban Scale in China: A New Perspective from Residents’ Health
Source: MDPI journal article supplement (doi:10.3390/su152215984), 2023-11-15
Supplement: s1 [file s1]

## Supplementary Materials

### S1 – The list of cities analyzed in this study

Echoing Figure 3 in the manuscript, this study also provides the list of 290 Chinese cities for analysis as the following table shows.

Table S1. List of 290 Chinese cities for analysis

| #  | city         | province       | #   | city       | province | #   | city          | province  |
|----|--------------|----------------|-----|------------|----------|-----|---------------|-----------|
| 1  | Beijing      | Beijing        | 93  | Hefei      |          | 188 | Guangzhou     |           |
| 2  | Tianjin      | Tianjin        | 94  | Wuhu       |          | 189 | Shaoguan      |           |
| 3  | Shijiazhuang |                | 95  | Bengbu     |          | 190 | Shenzhen      |           |
| 4  | Tangshan     |                | 96  | Huainan    |          | 191 | Zhuhai        |           |
| 5  | Qinhuangdao  |                | 97  | Ma'anshan  |          | 192 | Shantou       |           |
| 6  | Handan       |                | 98  | Huaibei    |          | 193 | Foshan        |           |
| 7  | Xingtai      |                | 99  | Tongling   |          | 194 | Jiangmen      |           |
| 8  | Baoding      | Hebei          | 100 | Anqing     | Anhui    | 195 | Zhanjiang     |           |
| 9  | Zhangjiakou  |                | 101 | Huangshan  |          | 196 | Maoming       |           |
| 10 | Chengde      |                | 102 | Chuzhou    |          | 197 | Zhaoqing      |           |
| 11 | Cangzhou     |                | 103 | Fuyang     |          | 198 | Huizhou       | Guangdong |
| 12 | Langfang     |                | 104 | Suzhou     |          | 199 | Meizhou       |           |
| 13 | Hengshui     |                | 105 | Lu'an      |          | 200 | Shanwei       |           |
| 14 | Taiyuan      |                | 106 | Bozhou     |          | 201 | Heyuan        |           |
| 15 | Datong       |                | 107 | Chizhou    |          | 202 | Yangjiang     |           |
| 16 | Yangquan     |                | 108 | Xuancheng  |          | 203 | Qingyuan      |           |
| 17 | Changzhi     |                | 109 | Fuzhou     |          | 204 | Dongguan      |           |
| 18 | Jincheng     |                | 110 | Xiamen     |          | 205 | Zhongshan     |           |
| 19 | Shuozhou     | Shanxi         | 111 | Putian     |          | 206 | Chaozhou      |           |
| 20 | Jinzhong     |                | 112 | Sanming    |          | 207 | Jieyang       |           |
| 21 | Yuncheng     |                | 113 | Quanzhou   | Fujian   | 208 | Yunfu         |           |
| 22 | Xinzhou      |                | 114 | Zhangzhou  |          | 209 | Nanning       |           |
| 23 | Linfen       |                | 115 | Nanping    |          | 210 | Liuzhou       |           |
| 24 | Lvliang      |                | 116 | Longyan    |          | 211 | Guilin        |           |
| 25 | Hohhot       |                | 117 | Ningde     |          | 212 | Wuzhou        |           |
| 26 | Baotou       |                | 118 | Nanchang   |          | 213 | Beihai        |           |
| 27 | Wuhai        |                | 119 | Jingdezhen |          | 214 | Fangchenggang |           |
| 28 | Chifeng      |                | 120 | Pingxiang  |          | 215 | Qinzhou       | Guangxi   |
| 29 | Tongliao     | Inner Mongolia | 121 | Jiujiang   |          | 216 | Guigang       |           |
| 30 | Ordos        |                | 122 | Xinyu      |          | 217 | Yulin         |           |
| 31 | Hulun Buir   |                | 123 | Yingtian   | Jiangxi  | 218 | Baise         |           |
| 32 | Bayan Nur    |                | 124 | Ganzhou    |          | 219 | Hezhou        |           |
| 33 | Ulanqab      |                | 125 | Ji'an      |          | 220 | Hechi         |           |
| 34 | Shenyang     |                | 126 | Yichun     |          | 221 | Laibin        |           |
| 35 | Dalian       | Liaoning       | 127 | Fuzhou     |          | 222 | Chongzuo      |           |
| 36 | Anshan       |                | 128 | Shangrao   |          | 223 | Haikou        | Hainan    |

|    |              |              |     |              |          |     |            |           |
|----|--------------|--------------|-----|--------------|----------|-----|------------|-----------|
| 37 | Fushun       |              | 129 | Jinan        |          | 224 | Sanya      |           |
| 38 | Benxi        |              | 130 | Qingdao      |          | 225 | Chongqing  | Chongqing |
| 39 | Dandong      |              | 131 | Zibo         |          | 226 | Chengdu    |           |
| 40 | Jinzhou      |              | 132 | Zaozhuang    |          | 227 | Zigong     |           |
| 41 | Yingkou      |              | 133 | Dongying     |          | 228 | Panzhihua  |           |
| 42 | Fuxin        |              | 134 | Yantai       |          | 229 | Luzhou     |           |
| 43 | Liaoyang     |              | 135 | Weifang      |          | 230 | Deyang     |           |
| 44 | Panjin       |              | 136 | Jining       |          | 231 | Mianyang   |           |
| 45 | Tieling      |              | 137 | Taian        | Shandong | 232 | Guangyuan  |           |
| 46 | Chaoyang     |              | 138 | Weihai       |          | 233 | Suining    |           |
| 47 | Huludao      |              | 139 | Rizhao       |          | 234 | Neijiang   | Sichuan   |
| 48 | Changchun    |              | 140 | Laiwu        |          | 235 | Leshan     |           |
| 49 | Jilin        |              | 141 | Linyi        |          | 236 | Nanchong   |           |
| 50 | Siping       |              | 142 | Dezhou       |          | 237 | Meishan    |           |
| 51 | Liaoyuan     | Jilin        | 143 | Liaocheng    |          | 238 | Yibin      |           |
| 52 | Tonghua      |              | 144 | Binzhou      |          | 239 | Guang'an   |           |
| 53 | Baishan      |              | 145 | Heze         |          | 240 | Dazhou     |           |
| 54 | Songyuan     |              | 146 | Zhengzhou    |          | 241 | Ya'an      |           |
| 55 | Baicheng     |              | 147 | Kaifeng      |          | 242 | Bazhong    |           |
| 56 | Harbin       |              | 148 | Luoyang      |          | 243 | Ziyang     |           |
| 57 | Qiqihar      |              | 149 | Pingdingshan |          | 244 | Guiyang    |           |
| 58 | Jixi         |              | 150 | Anyang       |          | 245 | Liupanshui |           |
| 59 | Hegang       |              | 151 | Hebi         |          | 246 | Zunyi      | Guizhou   |
| 60 | Shuangyashan |              | 152 | Xinxiang     |          | 247 | Anshun     |           |
| 61 | Daqing       | Heilongjiang | 153 | Jiaozuo      |          | 248 | Bijie      |           |
| 62 | Yichun       |              | 154 | Puyang       | Henan    | 249 | Tongren    |           |
| 63 | Jiamusi      |              | 155 | Xuchang      |          | 250 | Kunming    |           |
| 64 | Qitaihe      |              | 156 | Luohe        |          | 251 | Qujing     |           |
| 65 | Mudanjiang   |              | 157 | Sanmenxia    |          | 252 | Yuxi       |           |
| 66 | Heihe        |              | 158 | Nanyang      |          | 253 | Baoshan    | Yunnan    |
| 67 | Suihua       |              | 159 | Shangqiu     |          | 254 | Zhaotong   |           |
| 68 | Shanghai     | Shanghai     | 160 | Xinyang      |          | 255 | Lijiang    |           |
| 69 | Nanjing      |              | 161 | Zhoukou      |          | 256 | Pu'er      |           |
| 70 | Wuxi         |              | 162 | Zhumadian    |          | 257 | Lincang    |           |
| 71 | Xuzhou       |              | 163 | Wuhan        |          | 258 | Lasa       | Tibet     |
| 72 | Changzhou    |              | 164 | Huangshi     |          | 259 | Shigatse   |           |
| 73 | Suzhou       |              | 165 | Shiyan       |          | 260 | Xi'an      |           |
| 74 | Nantong      | Jiangsu      | 166 | Yichang      |          | 261 | Tongchuan  |           |
| 75 | Lianyungang  |              | 167 | Xiangyang    | Hubei    | 262 | Baoji      |           |
| 76 | Huai'an      |              | 168 | Ezhou        |          | 263 | Xianyang   | Shaanxi   |
| 77 | Yancheng     |              | 169 | Jinmen       |          | 264 | Weinan     |           |
| 78 | Yangzhou     |              | 170 | Xiaogan      |          | 265 | Yan'an     |           |
| 79 | Zhenjiang    |              | 171 | Jinzhou      |          | 266 | Hanzhong   |           |
| 80 | Taizhou      |              | 172 | Huanggang    |          | 267 | Yulin      |           |

|    |          |          |     |             |       |     |            |          |
|----|----------|----------|-----|-------------|-------|-----|------------|----------|
| 81 | Suqian   |          | 173 | Xianning    |       | 268 | Ankang     |          |
| 82 | Hangzhou |          | 174 | Suizhou     |       | 269 | Shangluo   |          |
| 83 | Ningbo   |          | 175 | Changsha    |       | 270 | Lanzhou    |          |
| 84 | Wenzhou  |          | 176 | Zhuzhou     |       | 271 | Jiayuguan  |          |
| 85 | Jiaxing  |          | 177 | Xiangtan    |       | 272 | Jinchang   |          |
| 86 | Huzhou   |          | 178 | Hengyang    |       | 273 | Baiyin     |          |
| 87 | Shaoxing | Zhejiang | 179 | Shaoyang    |       | 274 | Tianshui   |          |
| 88 | Jinhua   |          | 180 | Yueyang     |       | 275 | Wuwei      | Gansu    |
| 89 | Quzhou   |          | 181 | Changde     | Hunan | 276 | Zhangye    |          |
| 90 | Zhoushan |          | 182 | Zhangjiajie |       | 277 | Pingliang  |          |
| 91 | Taizhou  |          | 183 | Yiyang      |       | 278 | Jiuquan    |          |
| 92 | Lishui   |          | 184 | Chenzhou    |       | 279 | Qingyang   |          |
|    |          |          | 185 | Yongzhou    |       | 280 | Dingxi     |          |
|    |          |          | 186 | Huaihua     |       | 281 | Longnan    |          |
|    |          |          | 187 | Loudi       |       | 282 | Xining     | Qinghai  |
|    |          |          |     |             |       | 283 | Haidong    |          |
|    |          |          |     |             |       | 284 | Yinchuan   |          |
|    |          |          |     |             |       | 285 | Shizuishan |          |
|    |          |          |     |             |       | 286 | Wuzhong    | Ningxia  |
|    |          |          |     |             |       | 287 | Guyuan     |          |
|    |          |          |     |             |       | 288 | Zhongwei   |          |
|    |          |          |     |             |       | 289 | Urumqi     | Xinjiang |
|    |          |          |     |             |       | 290 | Karamay    |          |

---

## S2 – The general trends of changes in environmental pollution and urban scale of different cities

According to the reviewers' comments, more graphical representations with the data sets of 290 different cities are presented as follows.

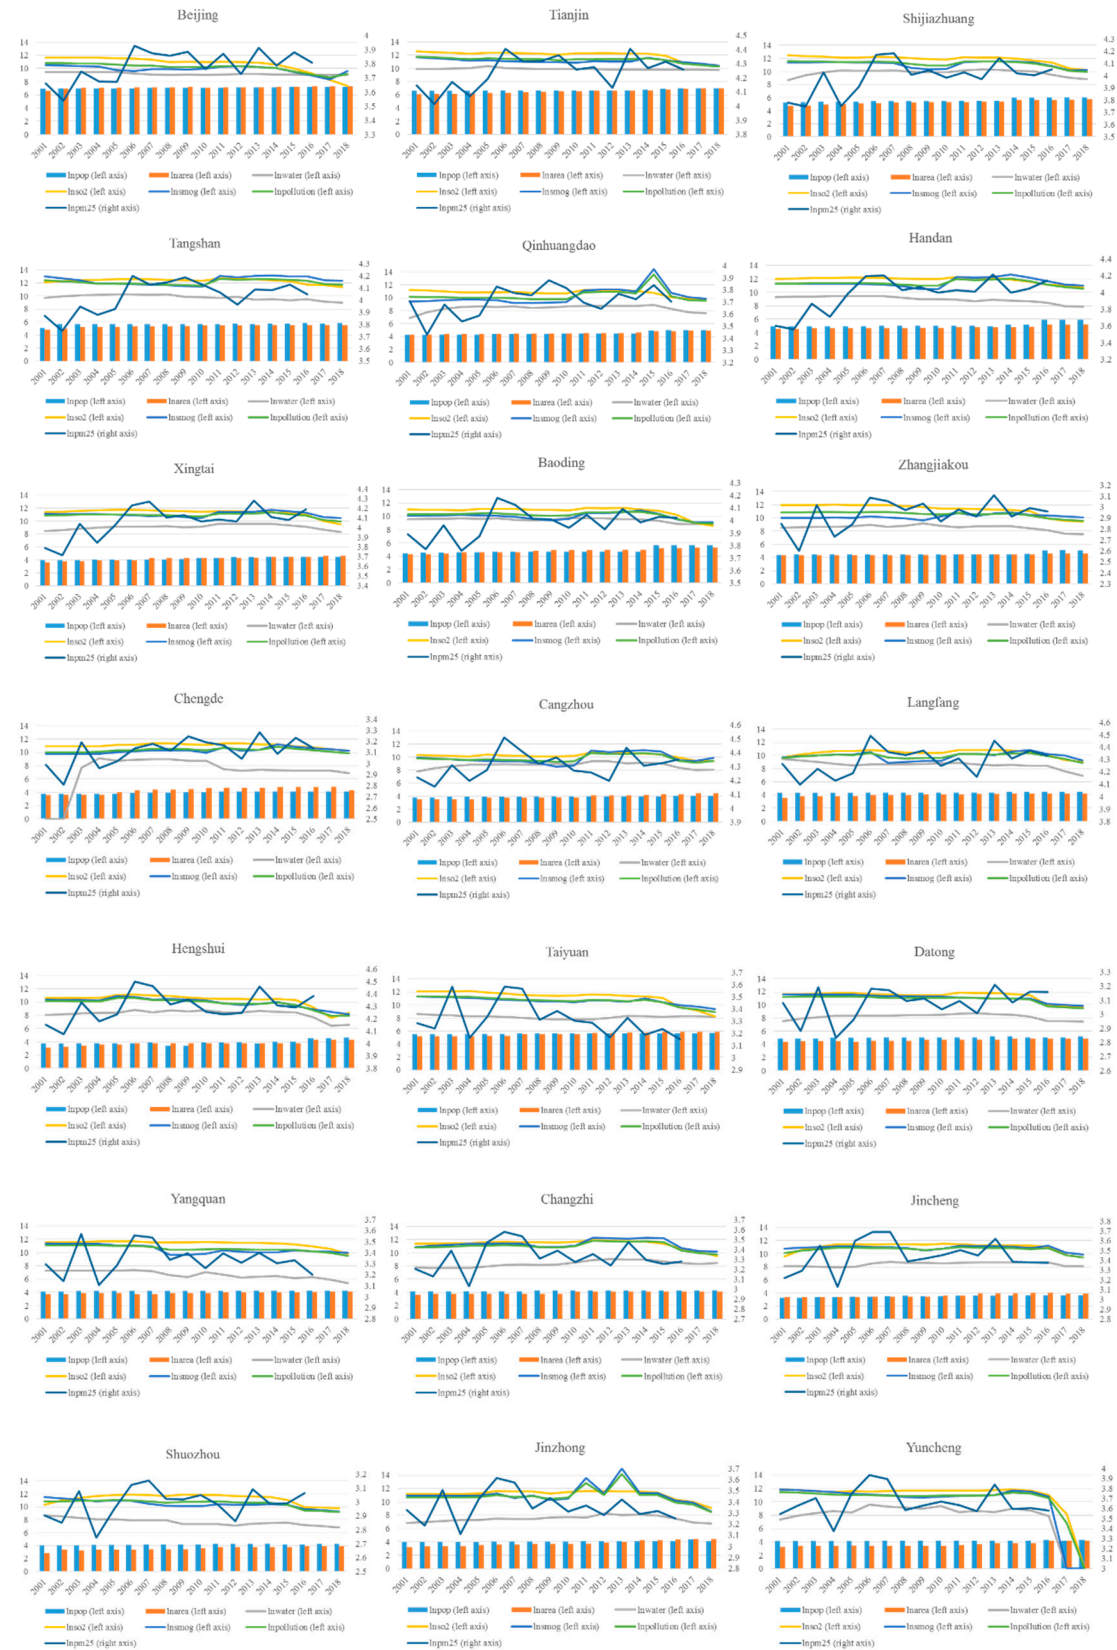



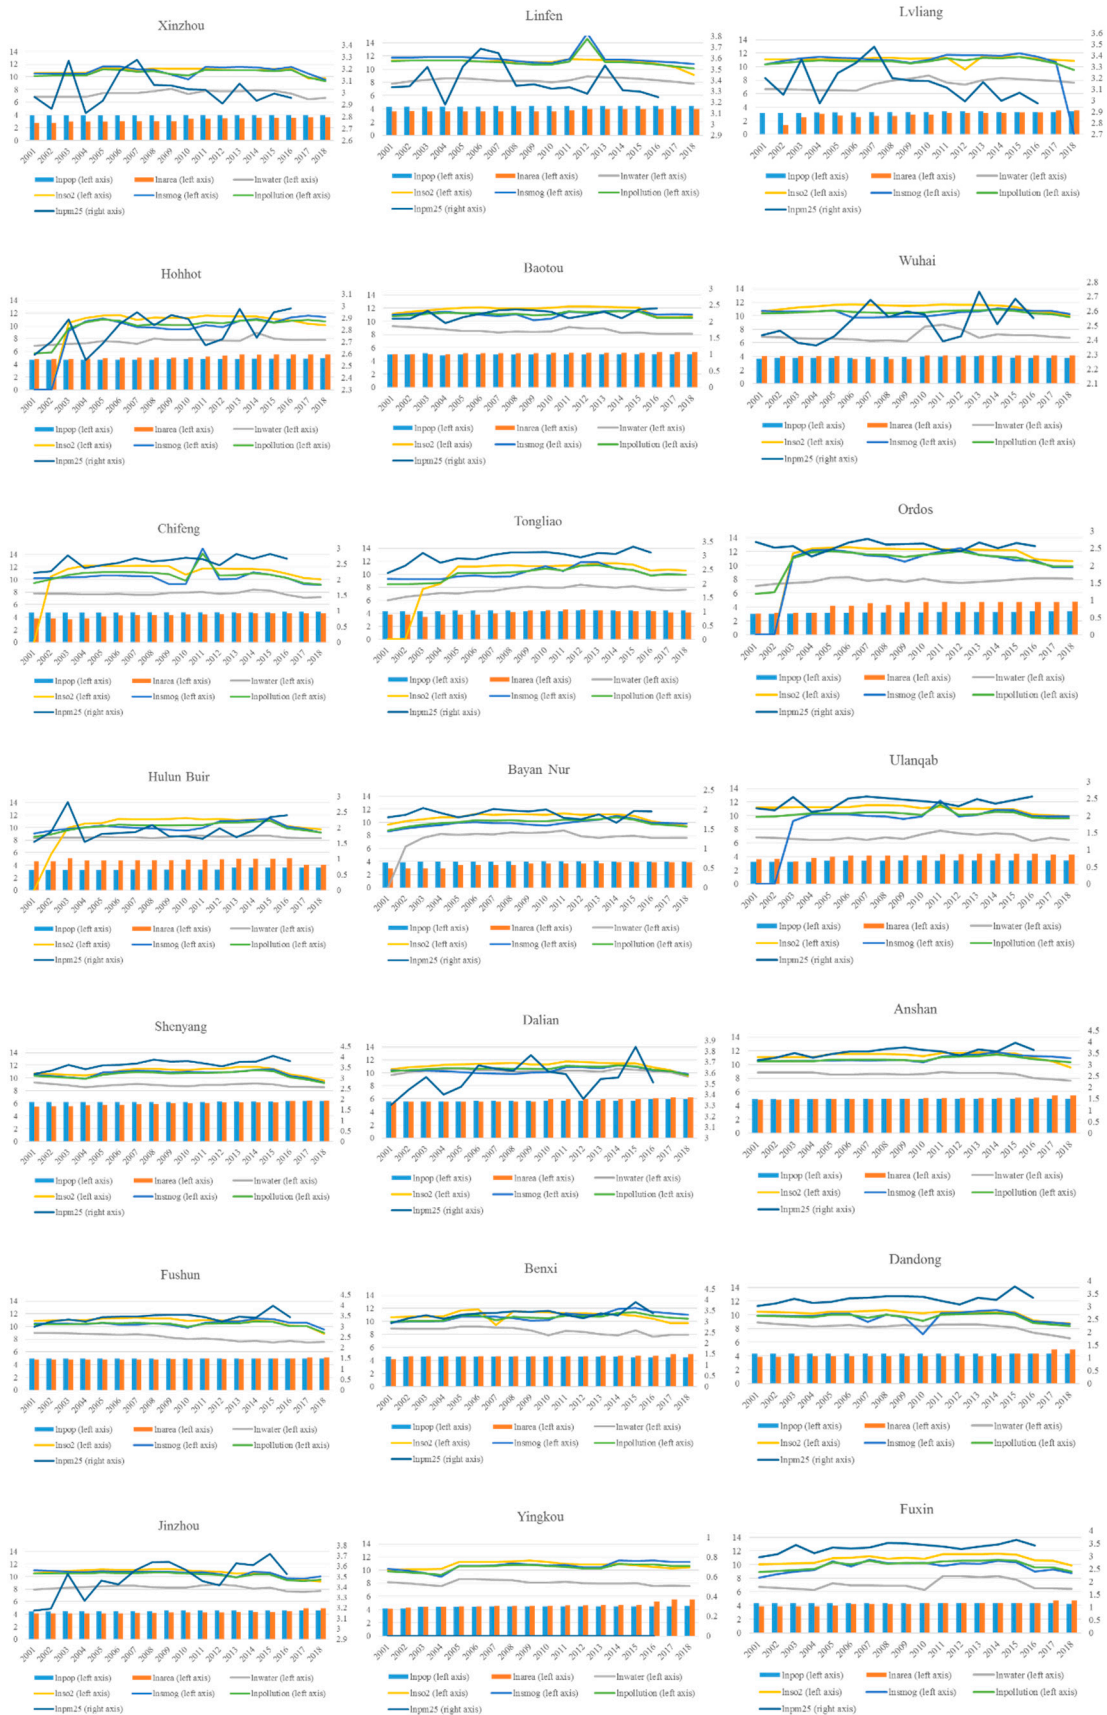

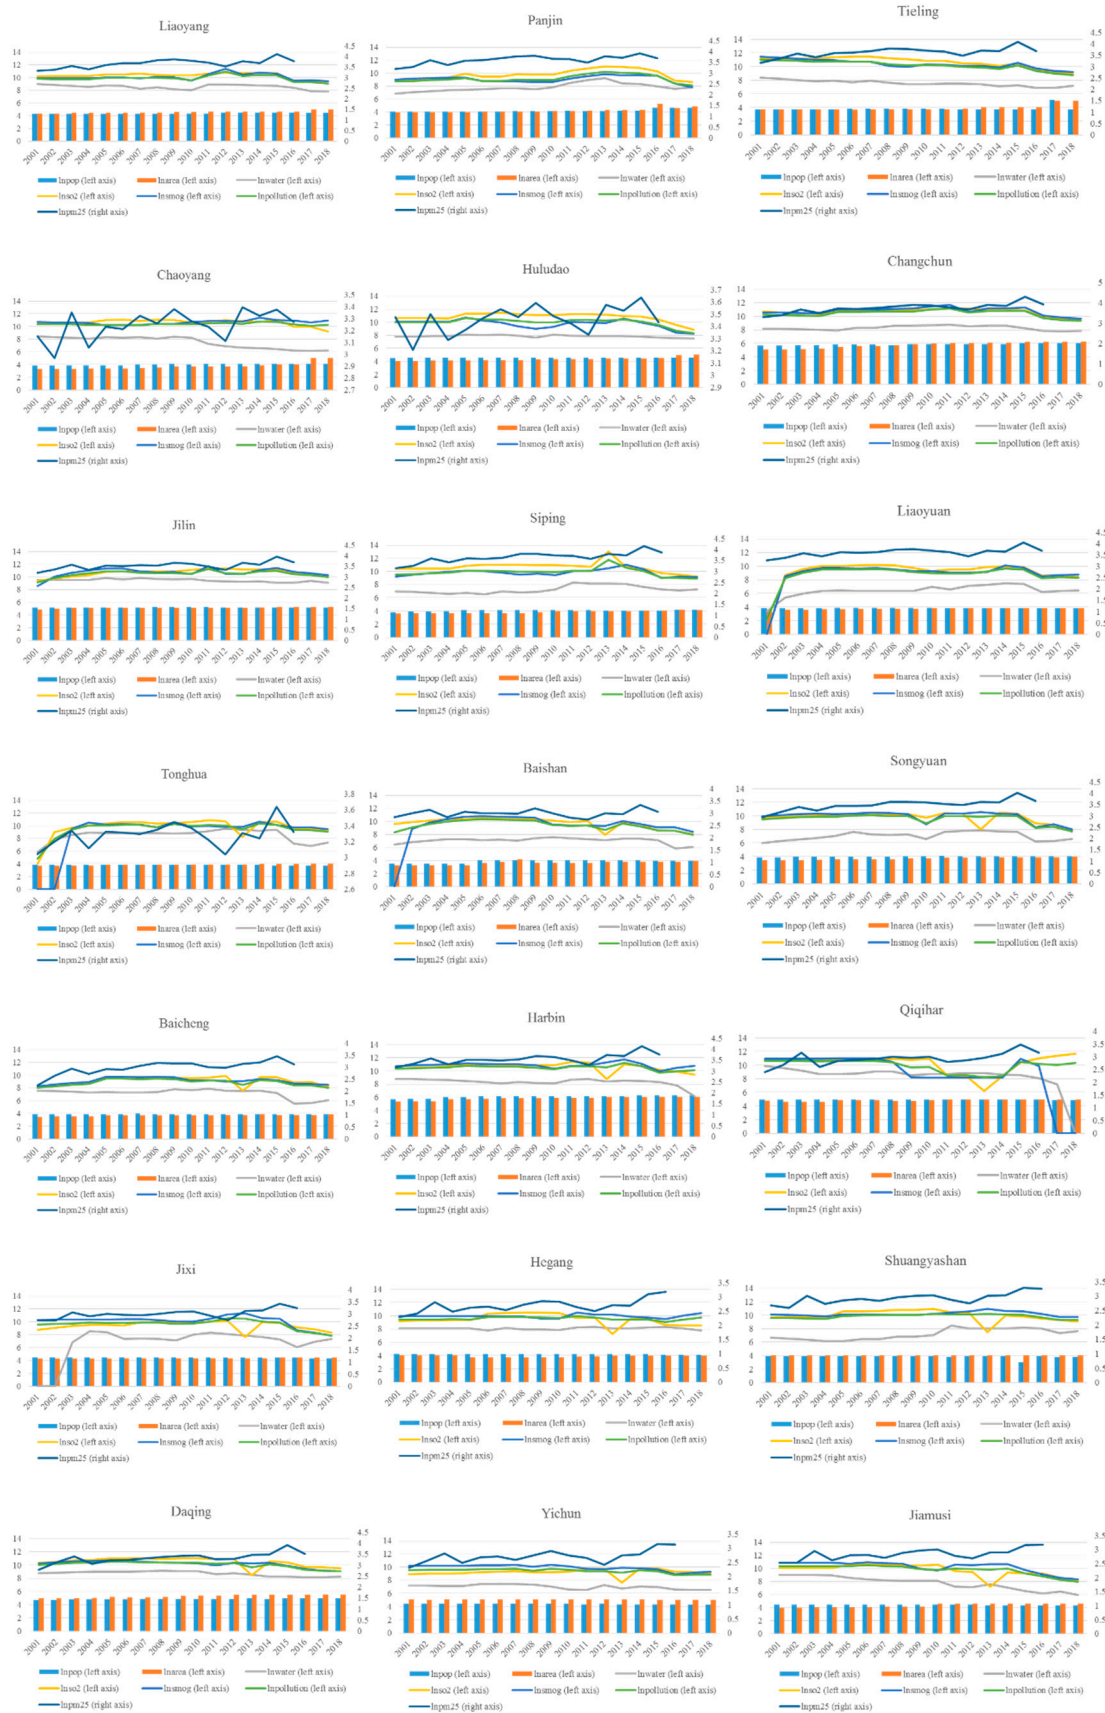

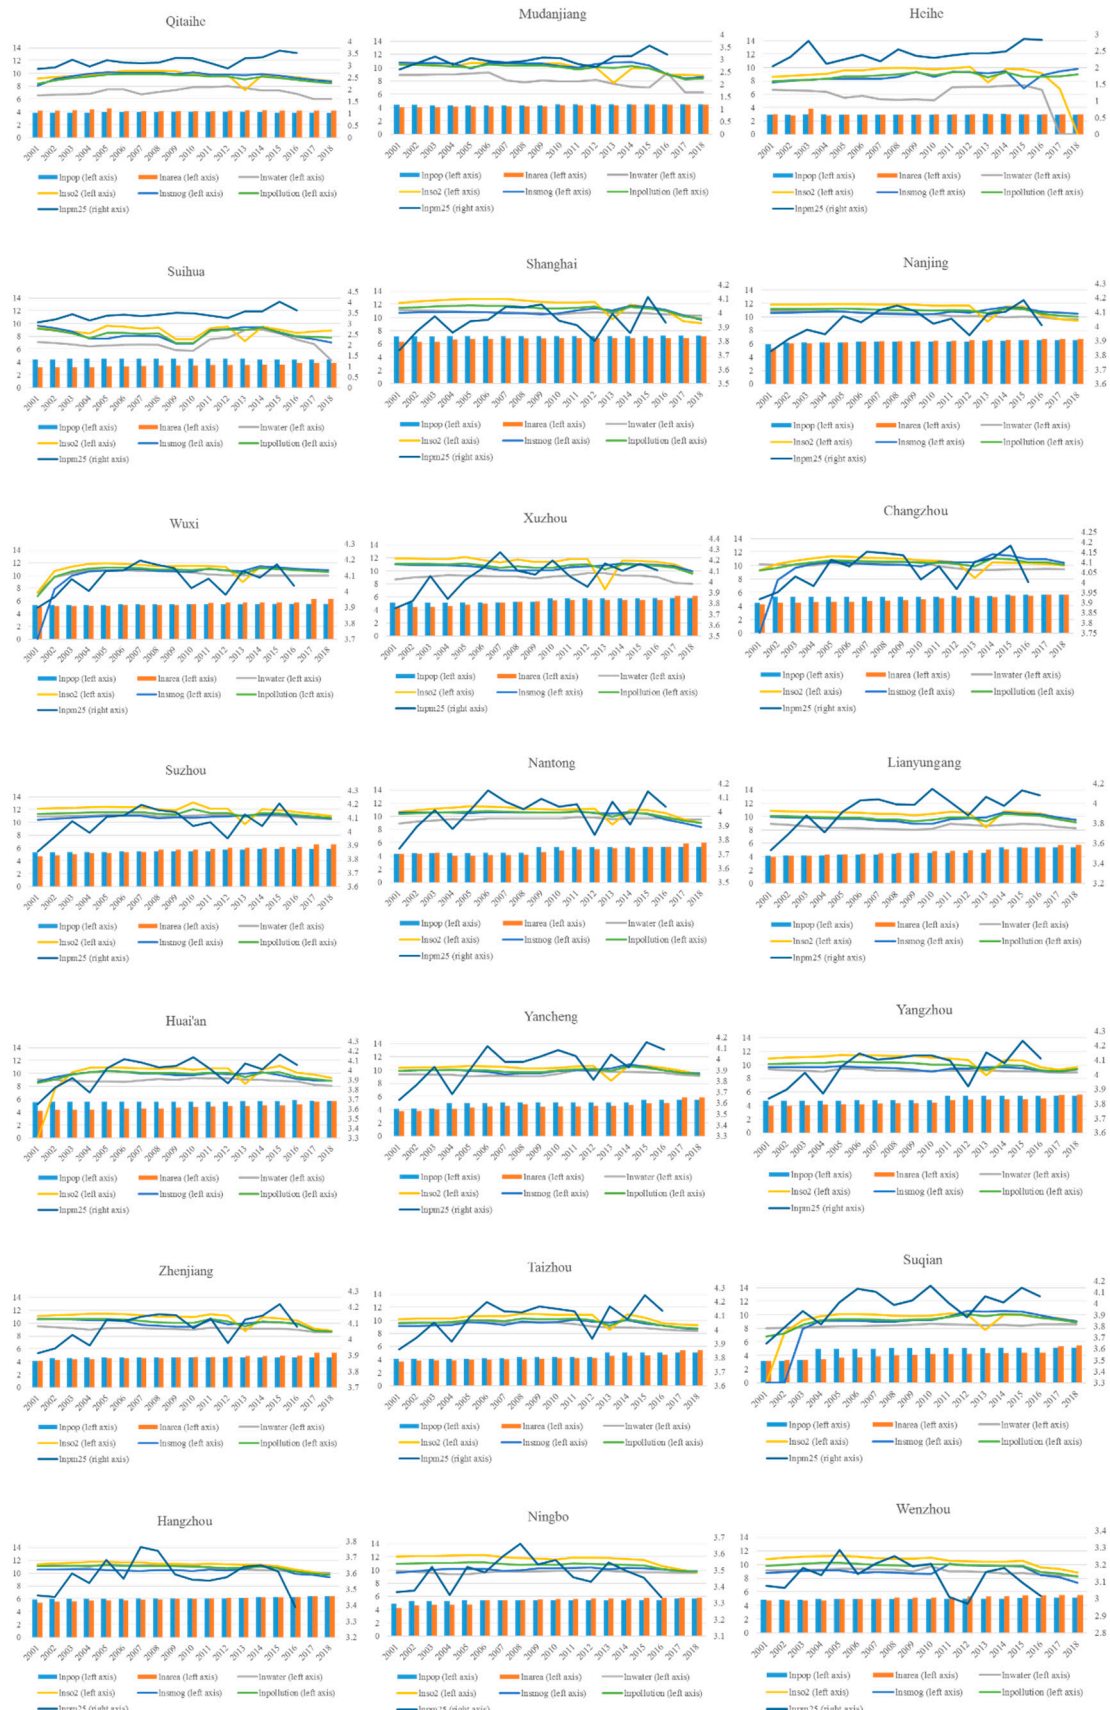



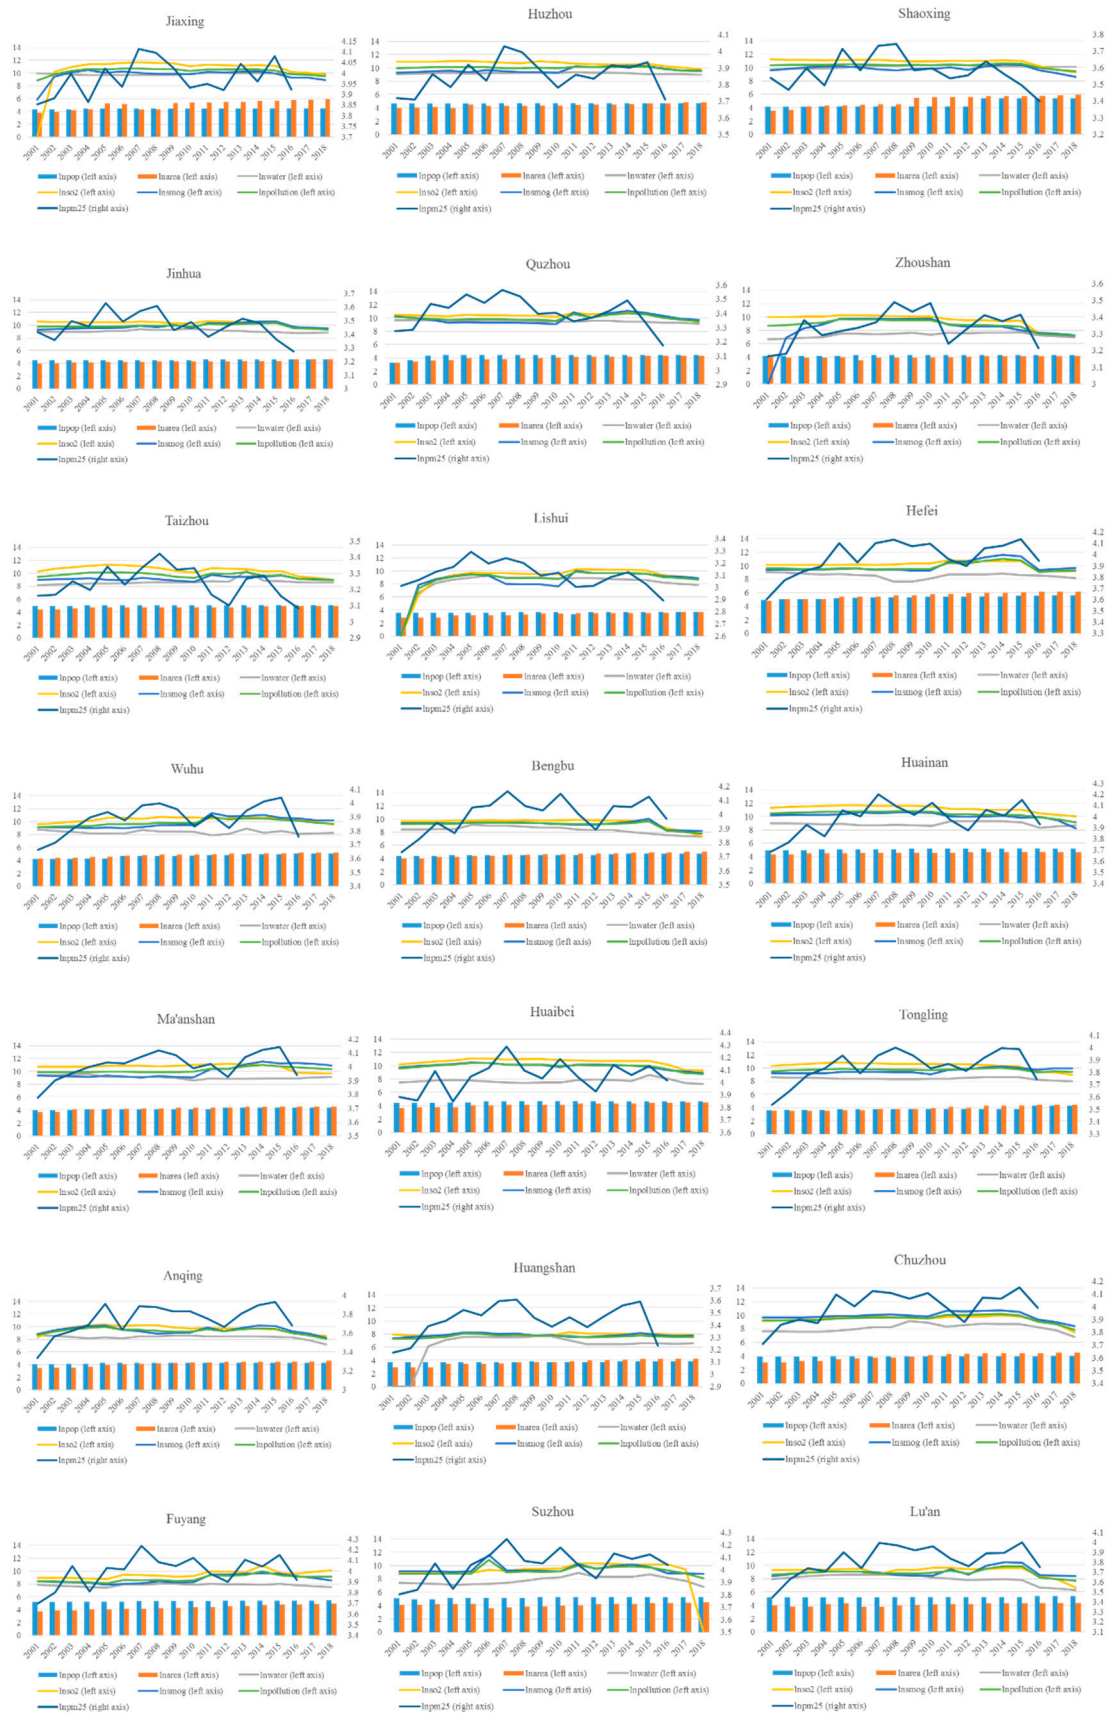

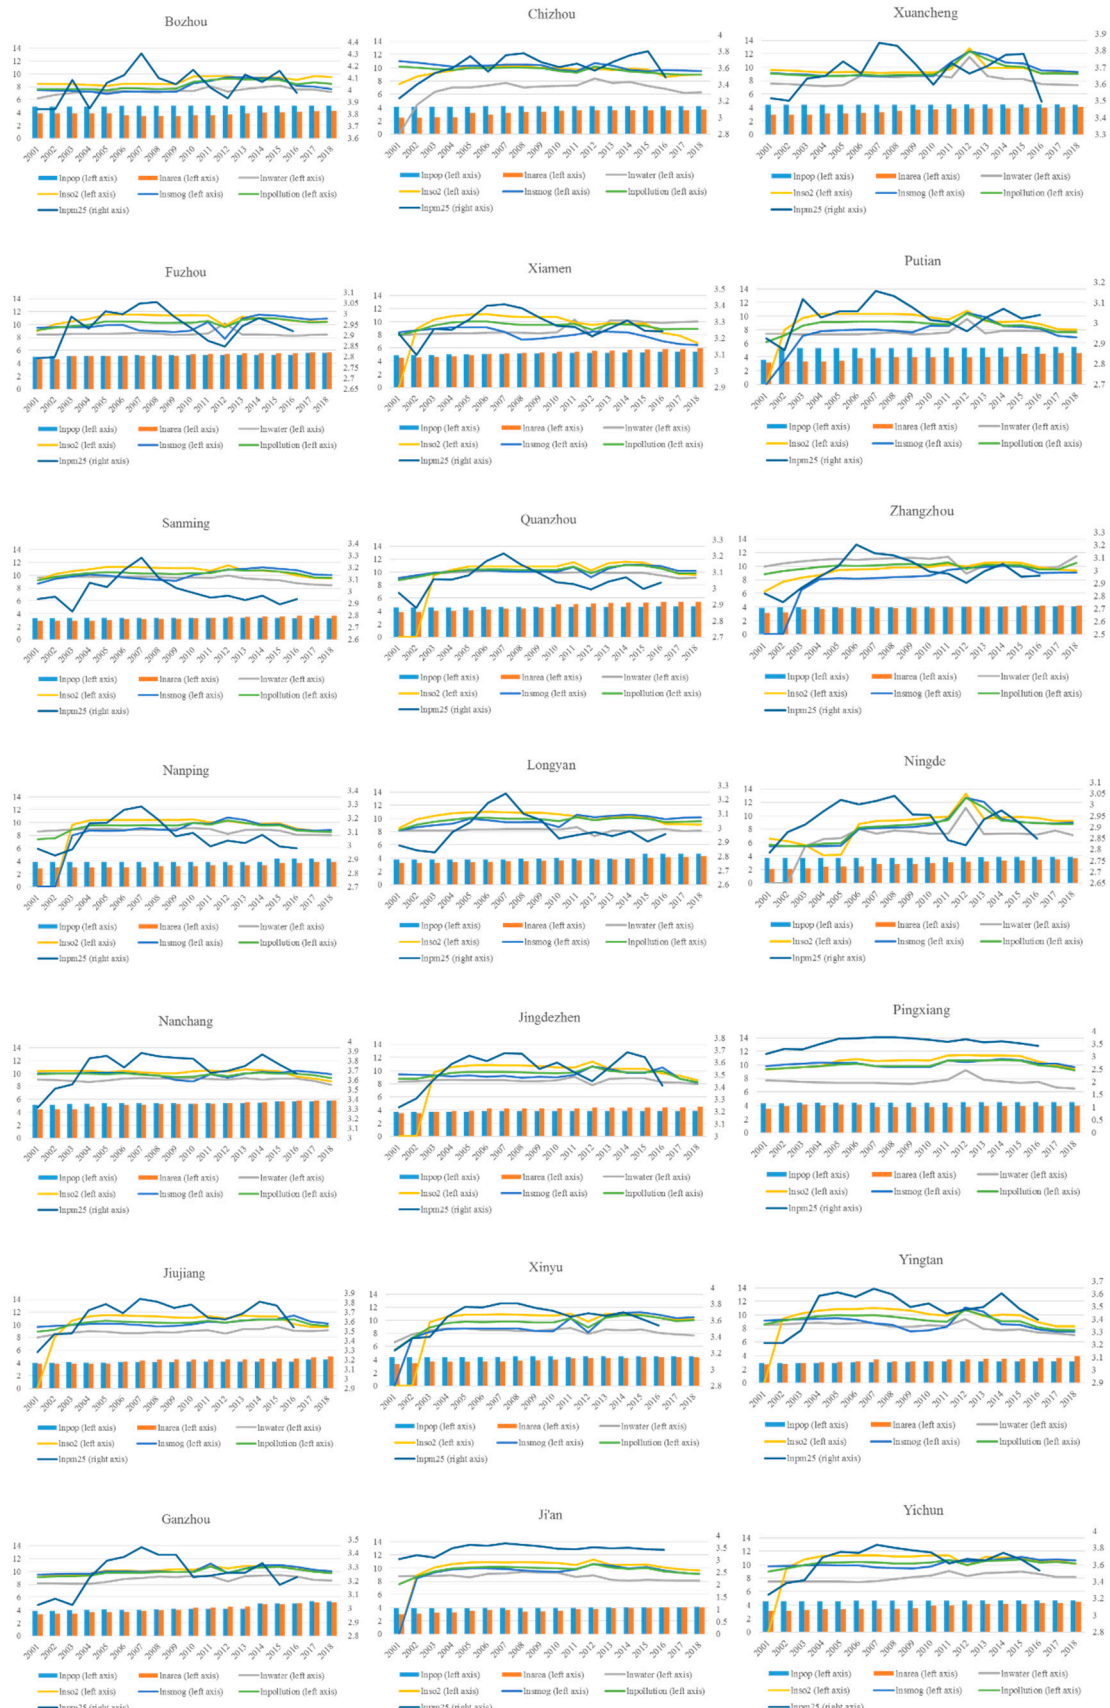

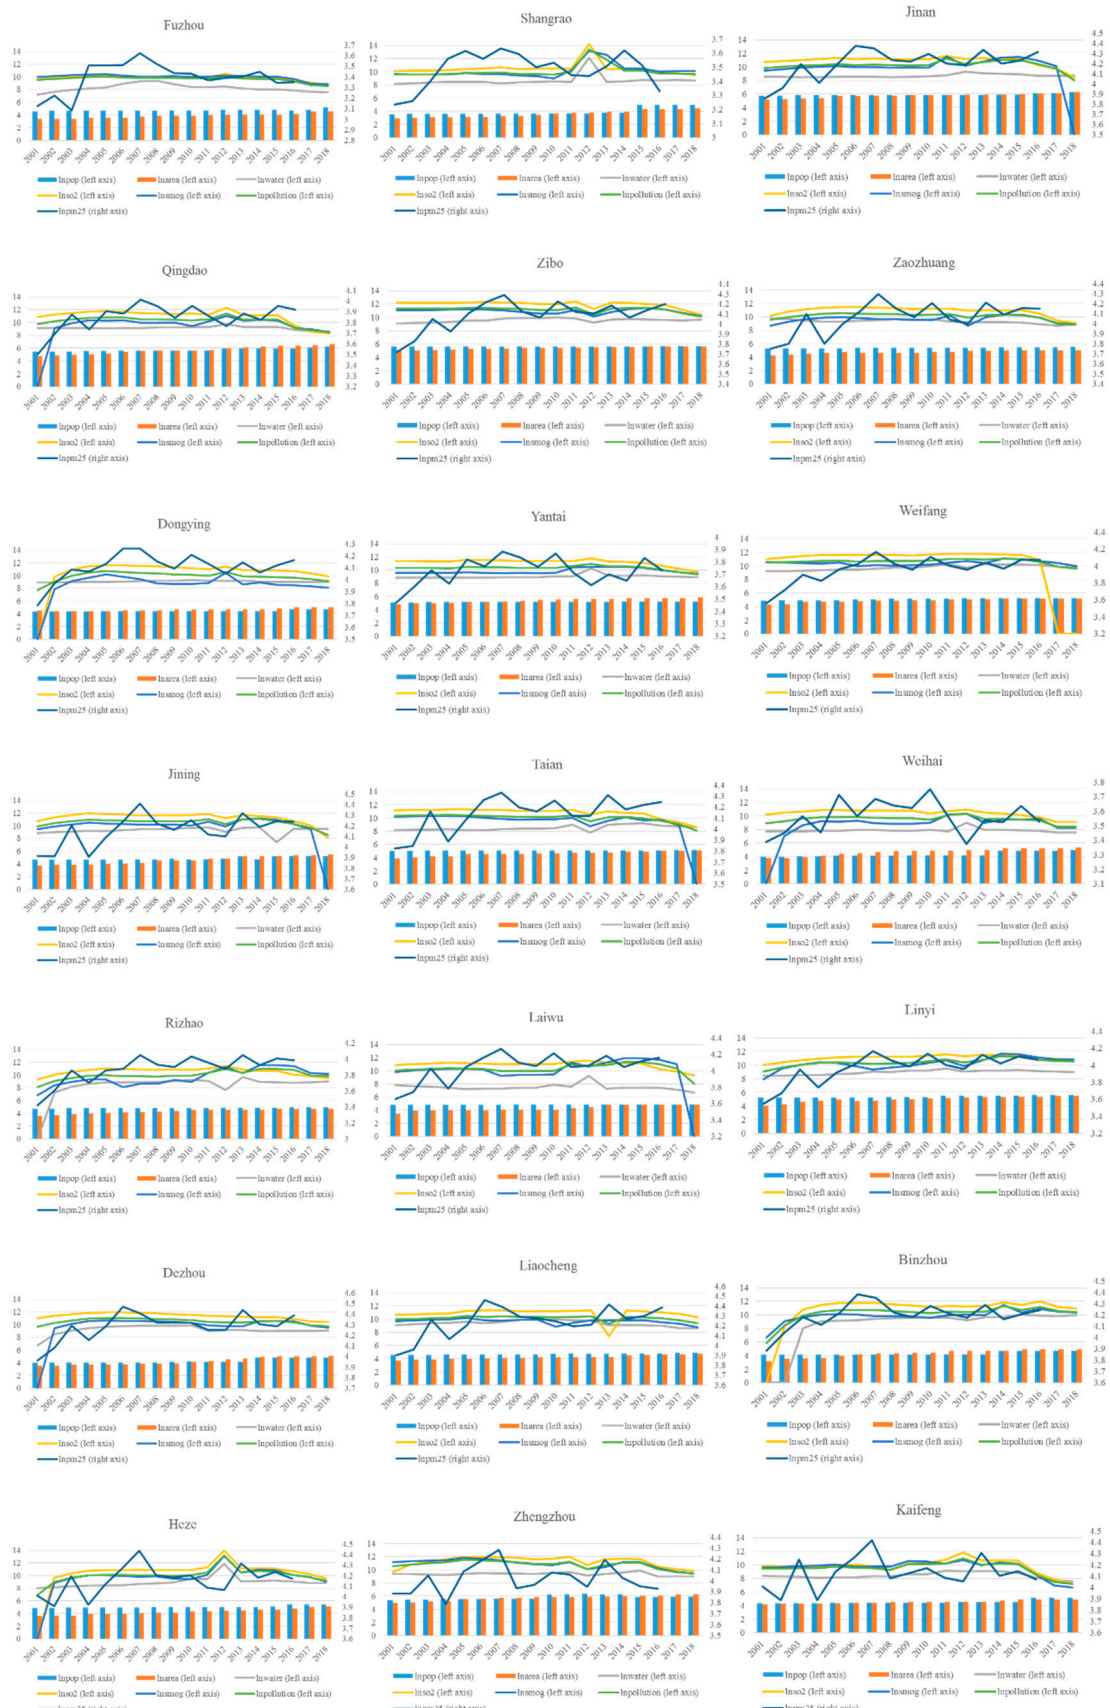



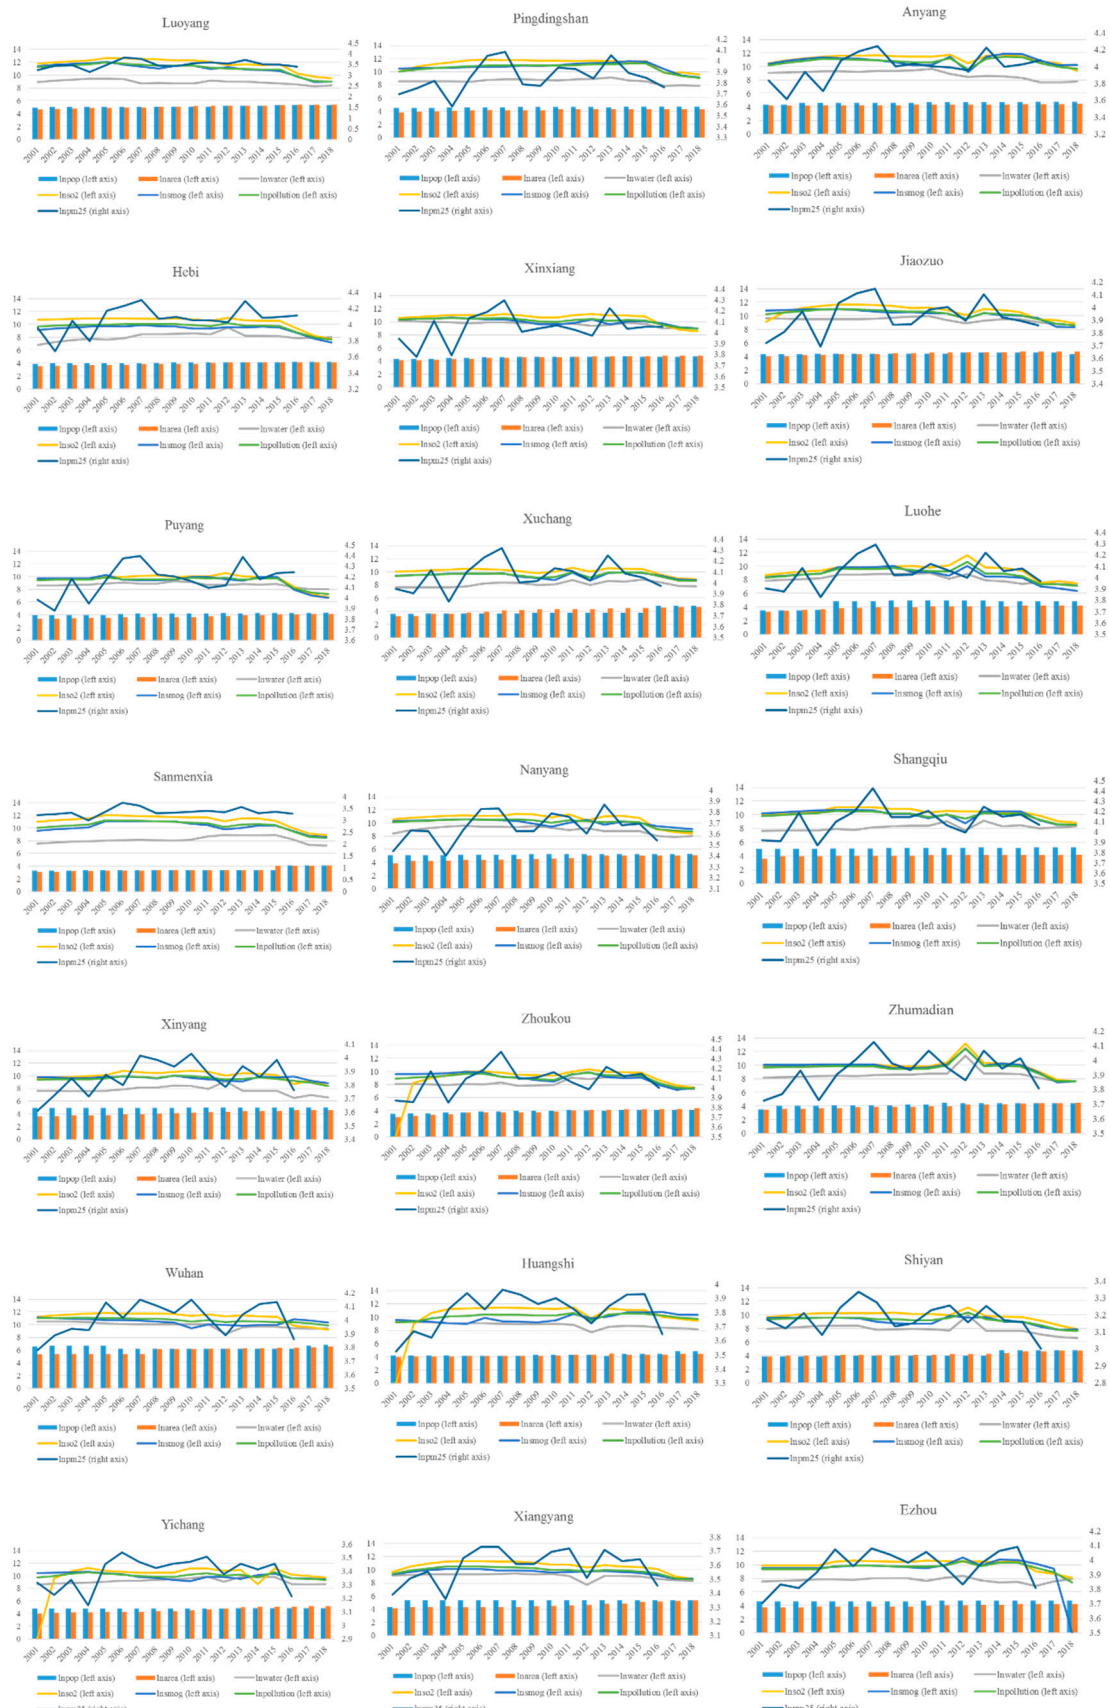

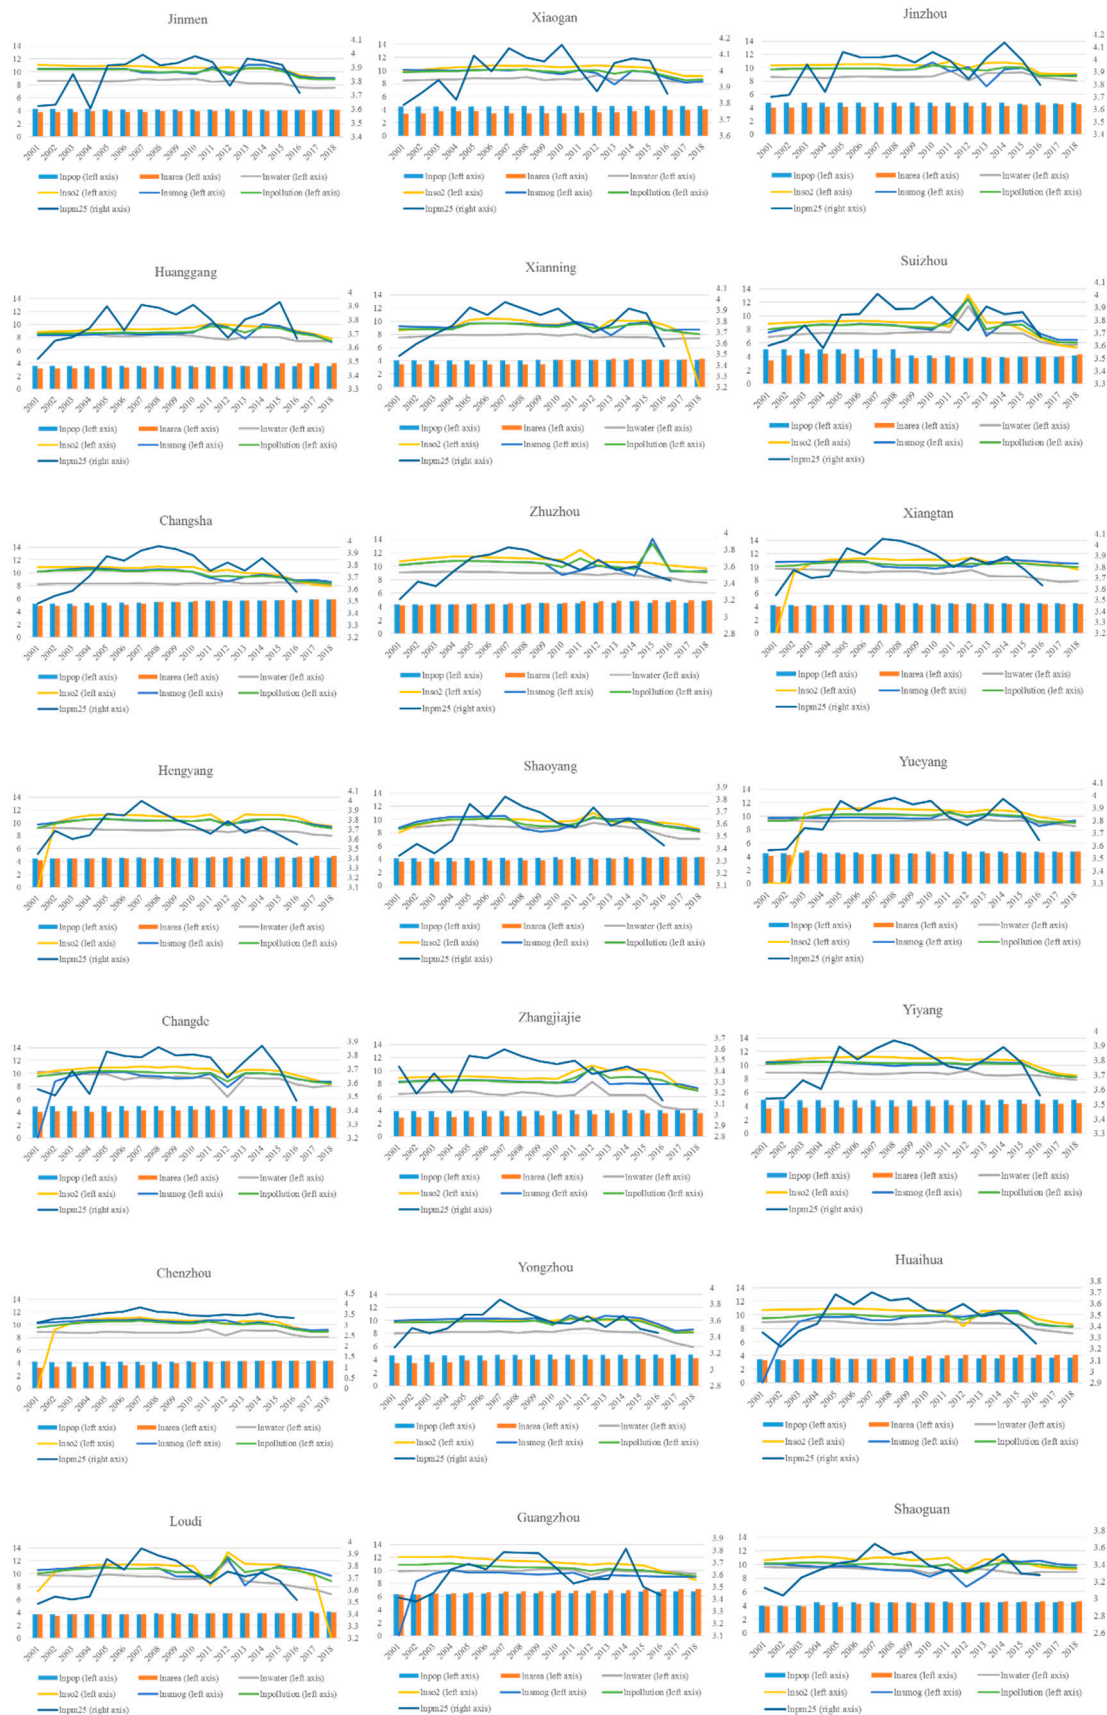



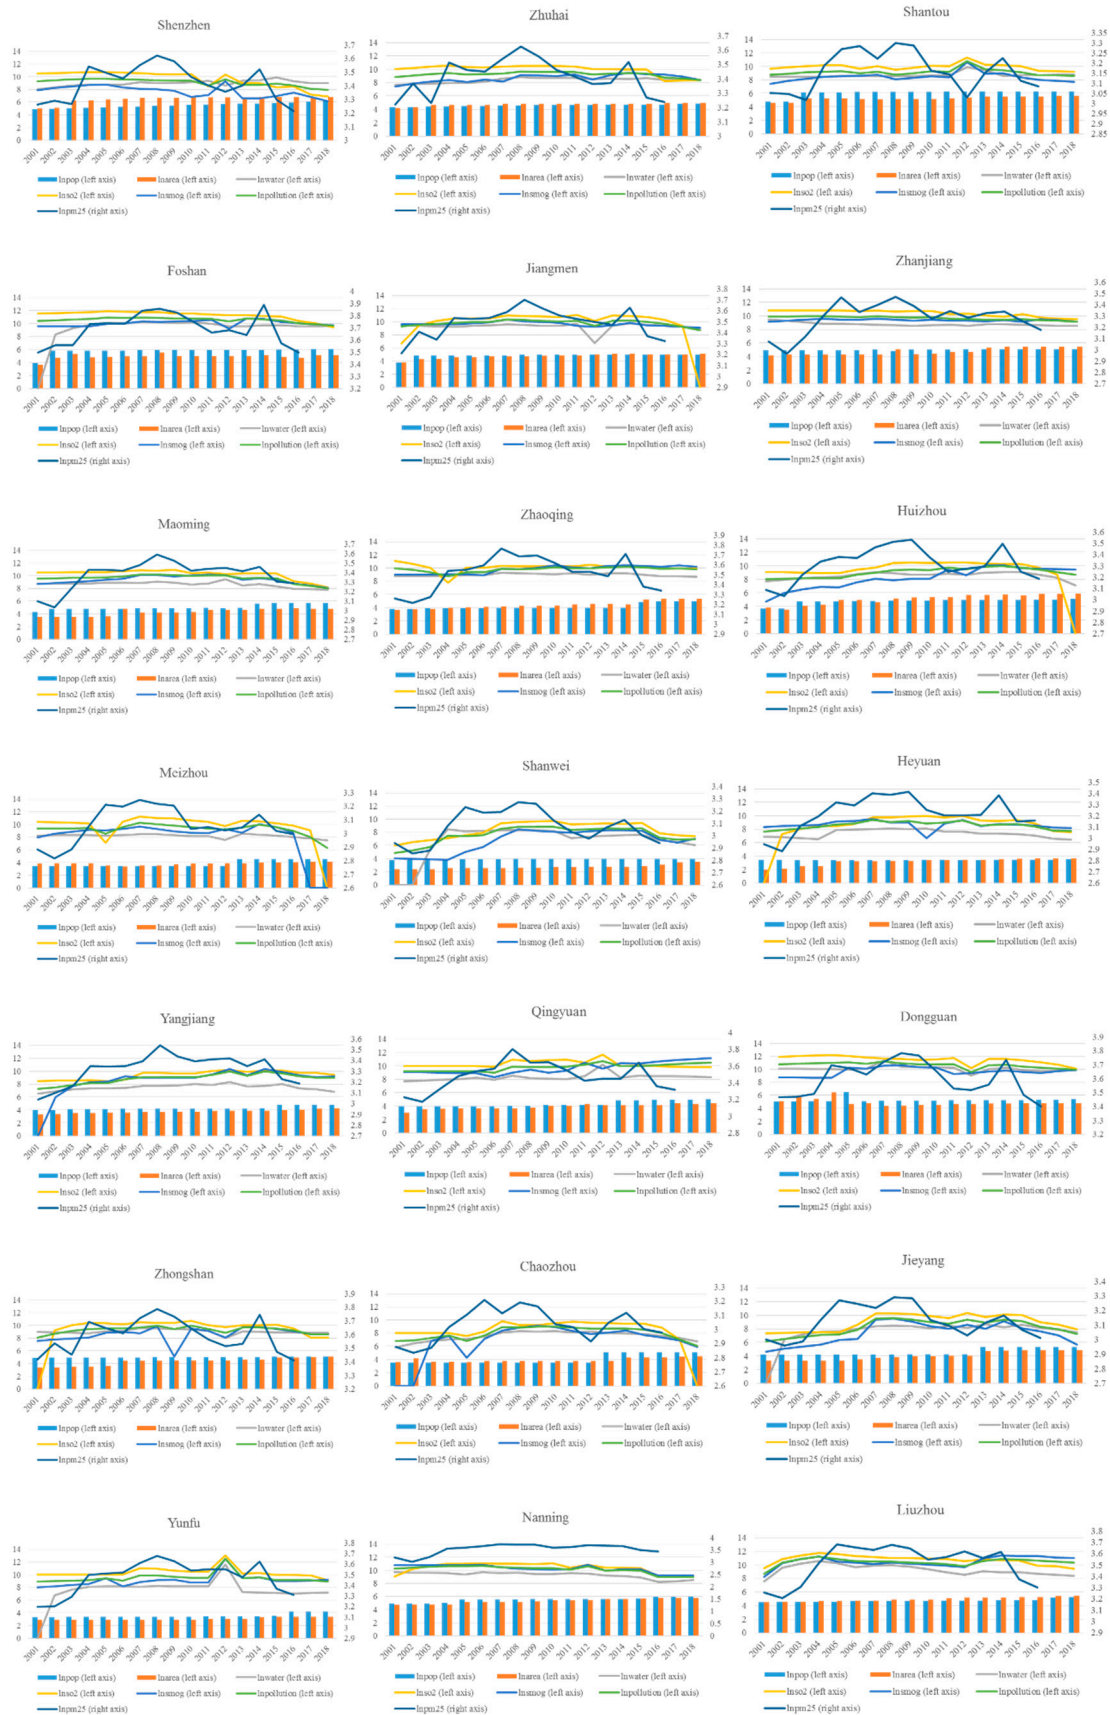

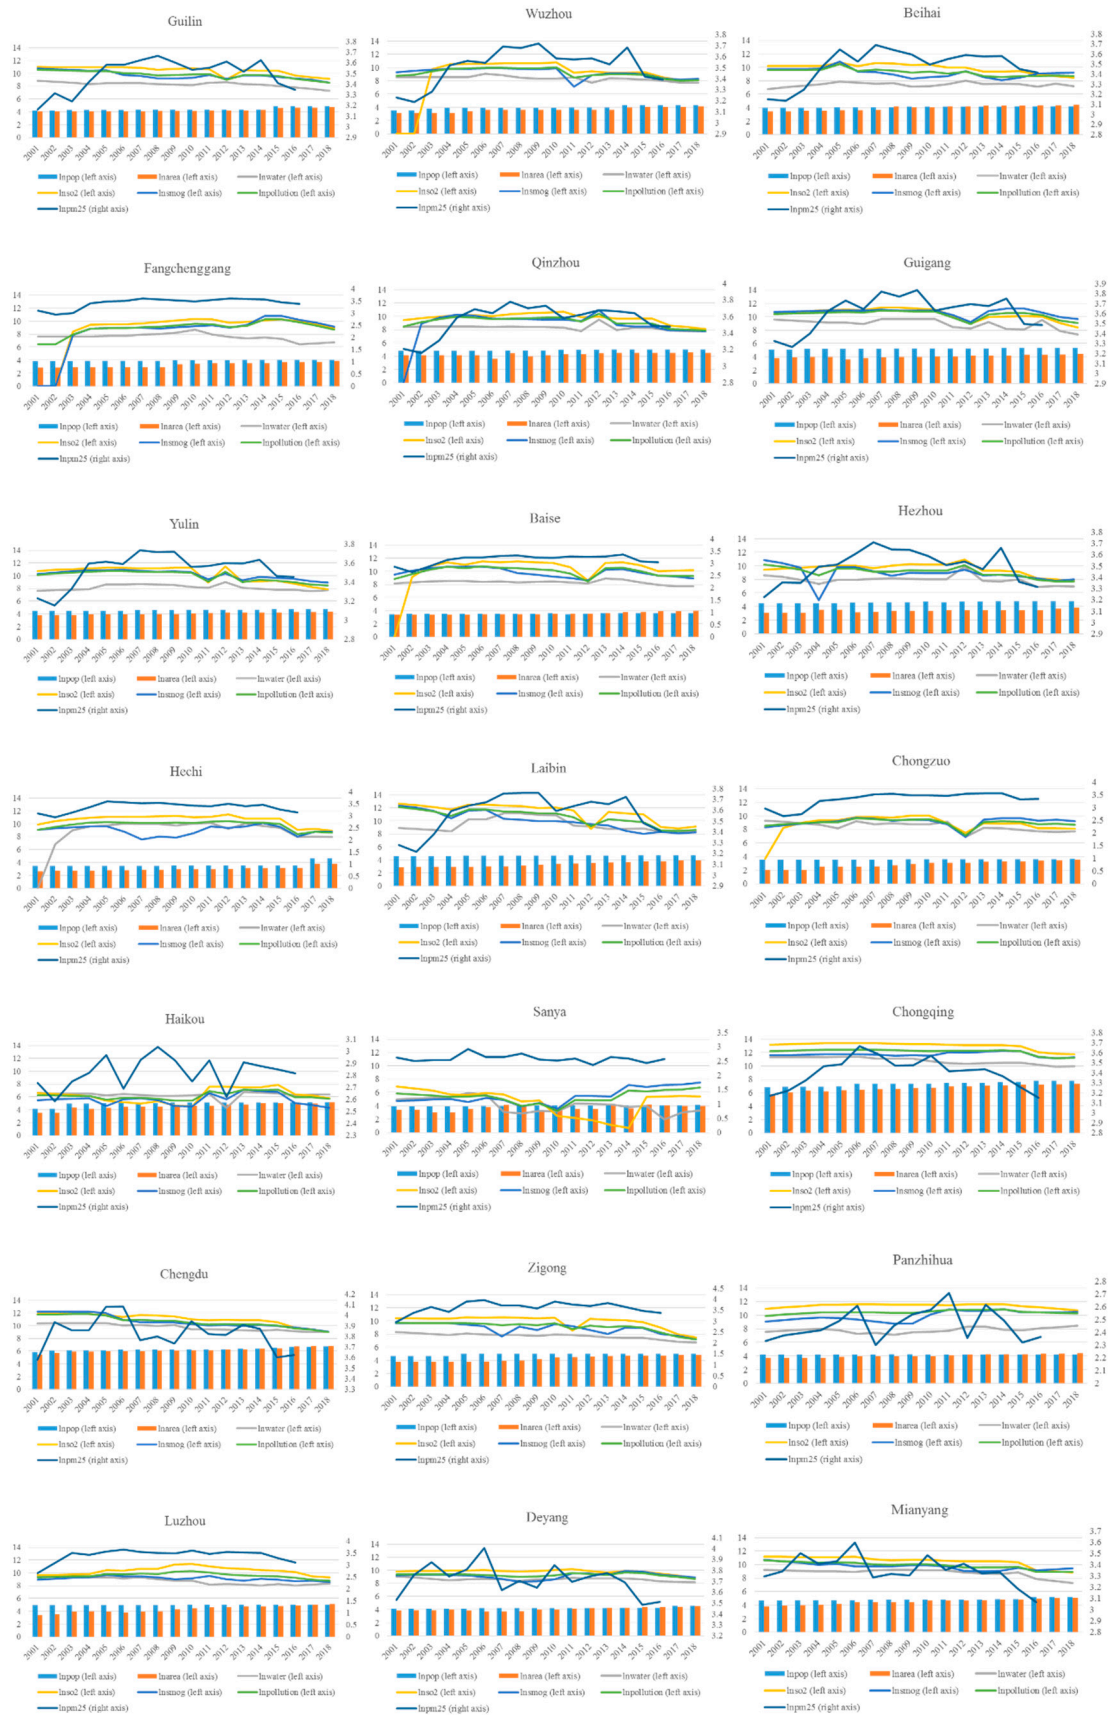

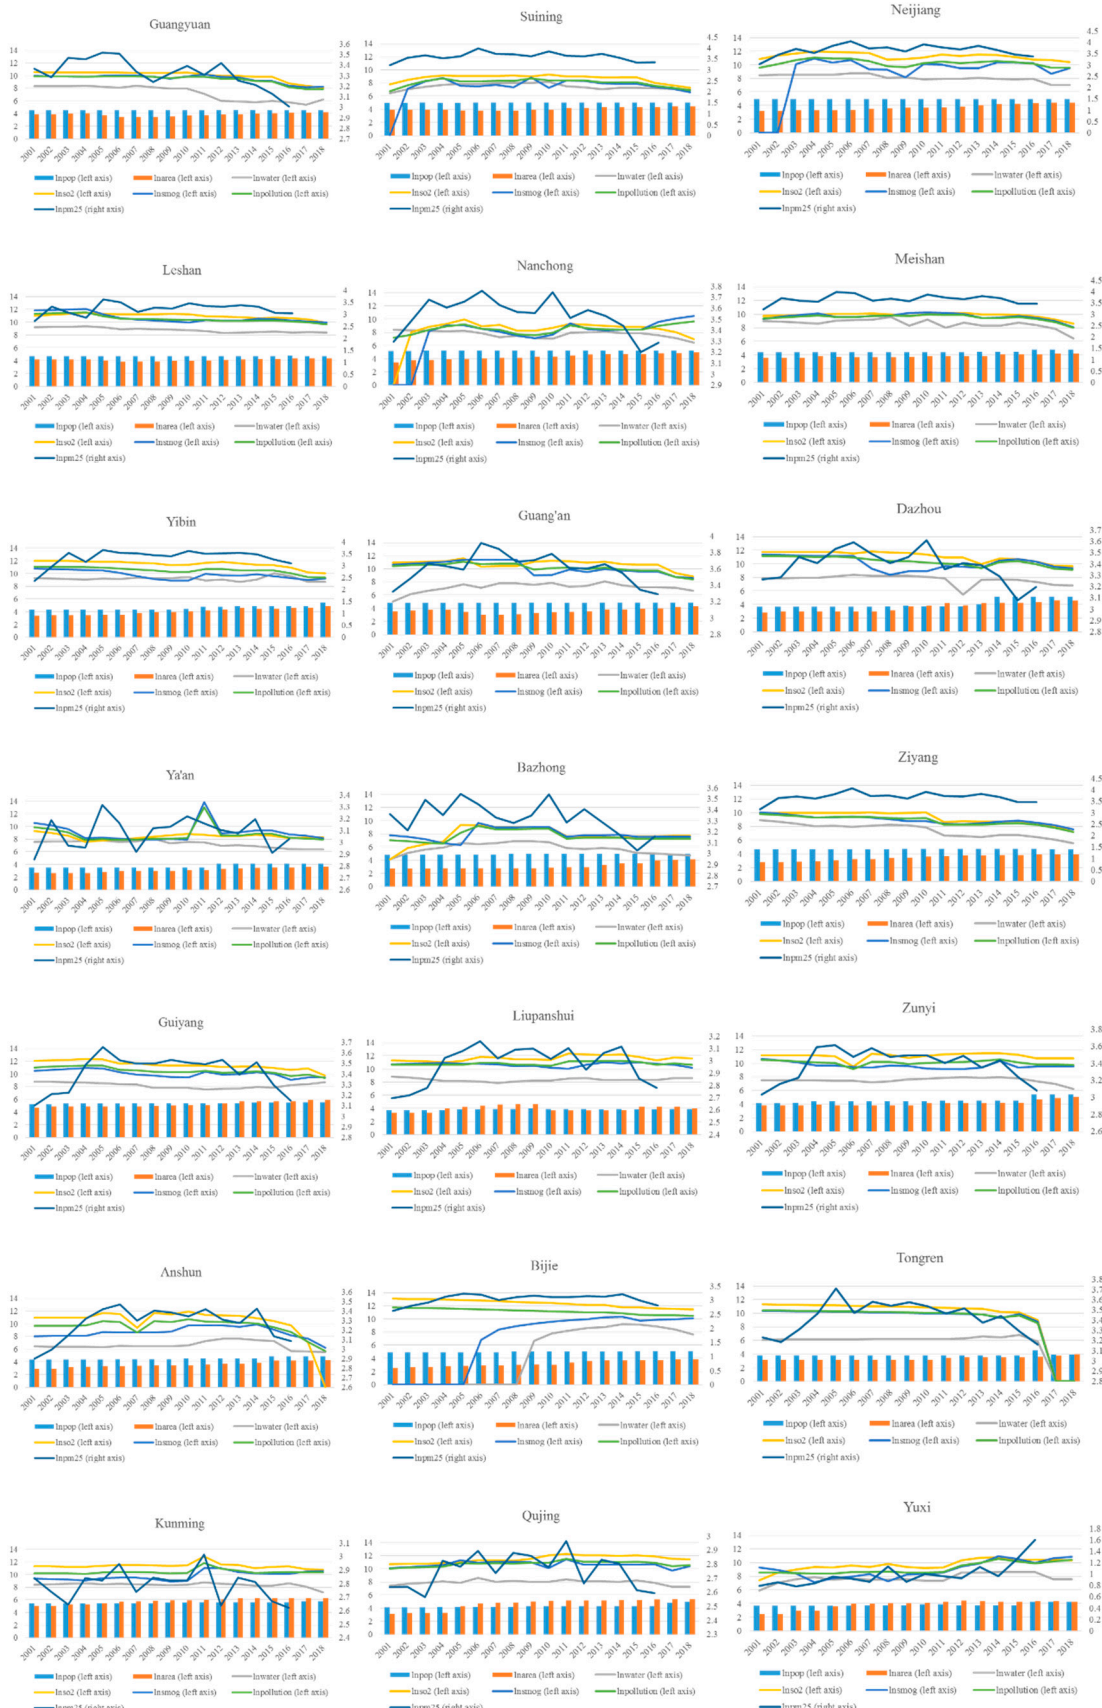



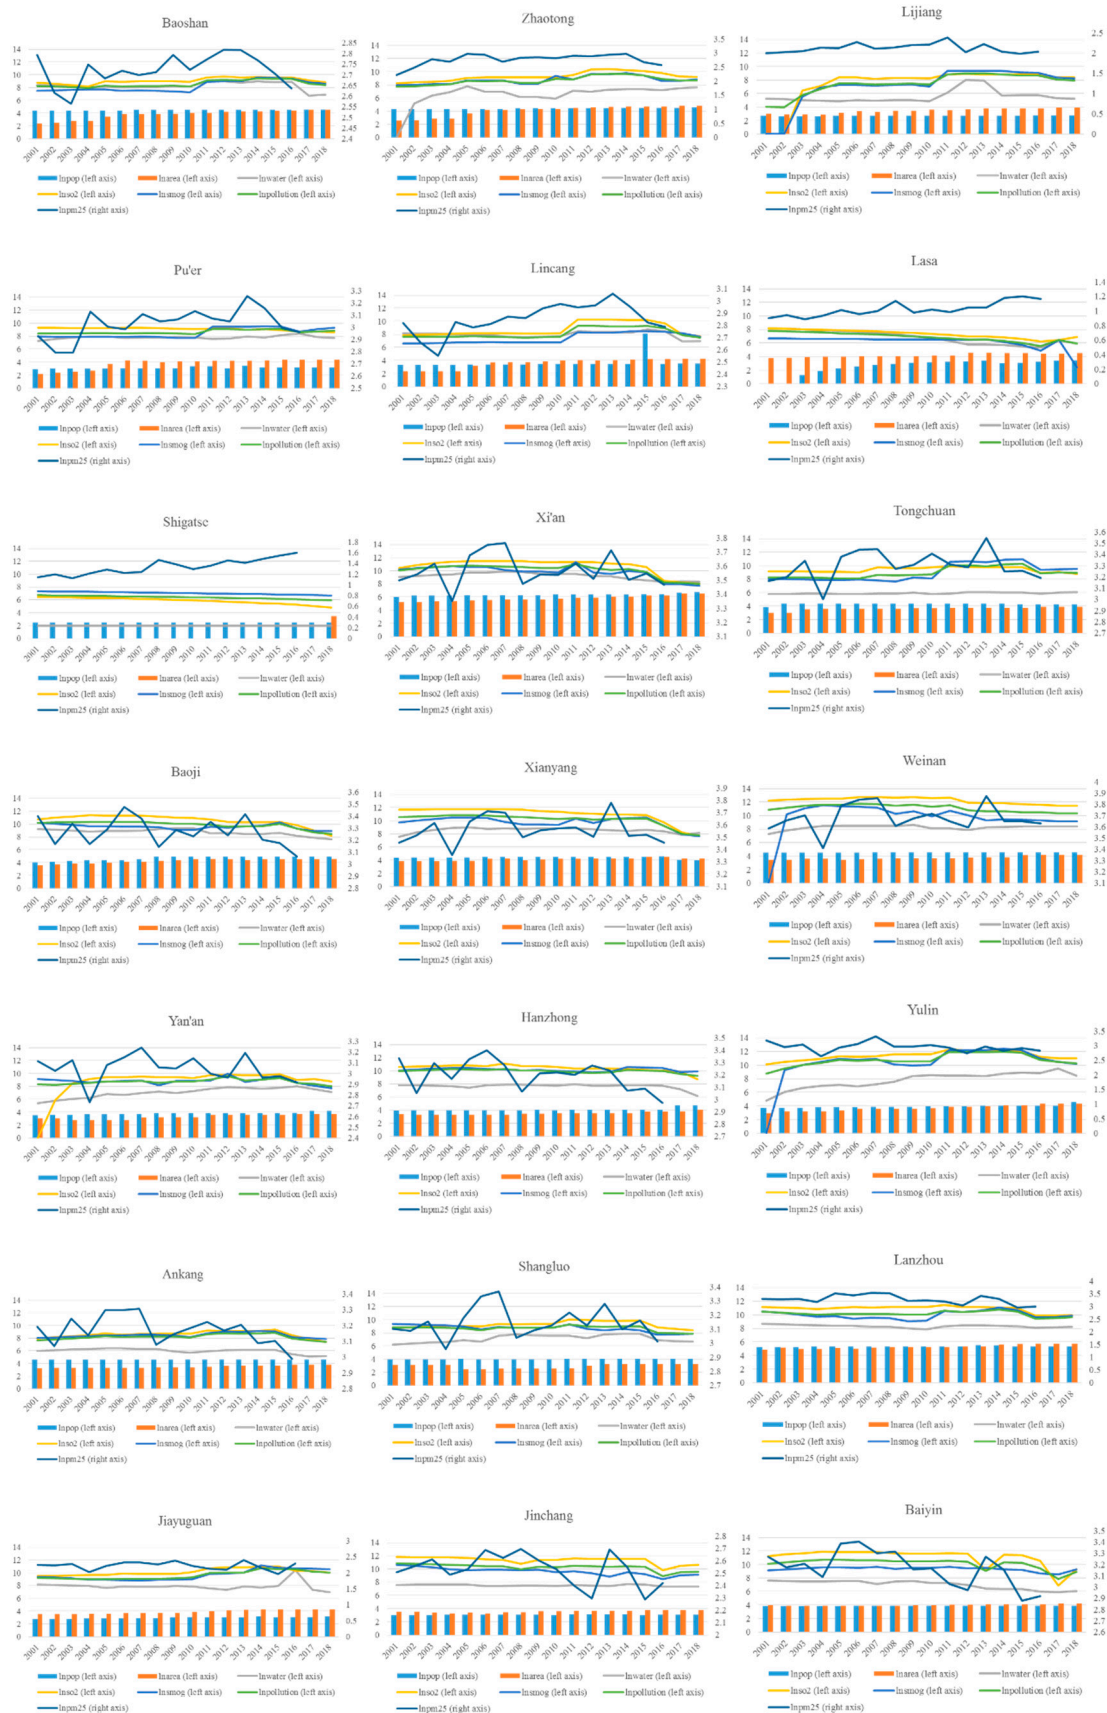

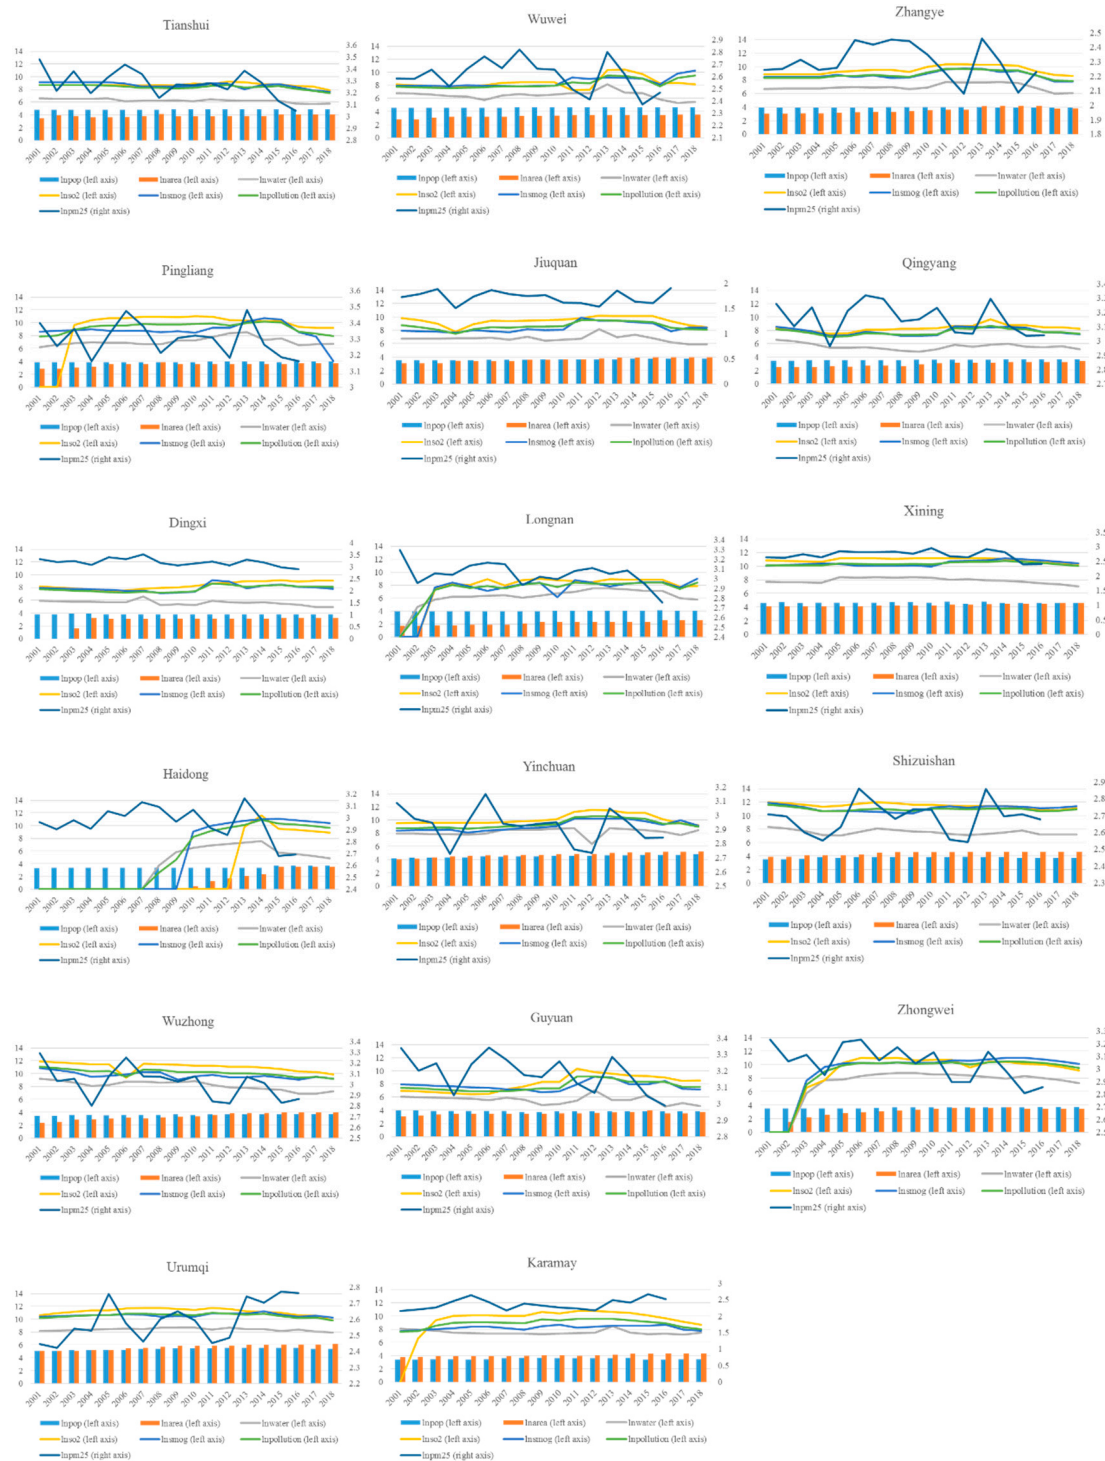

The above figures demonstrate that, there is a commonly-observed trend of growing urban scale in terms of both population and built-up land across Chinese cities over the years (depicted by the bars in the figures). Nevertheless, since the bi-directional impacts between the urban scale and environmental pollution, the patterns of their correlations differ. In most graphs, pollution (in particular the industrial pollution) appears to grow with the urban growth.

### S3 – results of the tests for multicollinearity problems

It is acknowledged that, the variance inflation factor (VIF) is the most frequently used indicator for detecting multicollinearity in multiple linear regression models [90]. Thus, this study conducted relevant tests based upon VIF and results are given as follows.

Table S2. VIF of variables for baseline regressions

| Models              | (1)           | (2)           | (3)           | (4)           |
|---------------------|---------------|---------------|---------------|---------------|
|                     | Table 3&4-(2) | Table 3&4-(4) | Table 3&4-(6) | Table 3&4-(8) |
| <i>lnpollution</i>  |               | 1.23          |               | 1.31          |
| <i>lnpm25</i>       |               |               | 1.30          | 1.33          |
| <i>lnwater</i>      | 1.87          |               |               |               |
| <i>lnso2</i>        | 1.76          |               |               |               |
| <i>lnsmog</i>       | 1.74          |               |               |               |
| <i>lnurban_r</i>    | 1.30          | 1.26          | 1.33          | 1.33          |
| <i>fiscgap</i>      | 1.09          | 1.08          | 1.07          | 1.07          |
| <i>lnprod_labor</i> | 6.74          | 6.74          | 6.78          | 6.82          |
| <i>lnprod_land</i>  | 3.09          | 2.99          | 3.14          | 3.15          |
| <i>lnwage</i>       | 5.84          | 5.82          | 5.51          | 5.64          |
| <i>lnmedi</i>       | 1.88          | 1.87          | 2.07          | 2.12          |
| <i>lnroad</i>       | 1.54          | 1.54          | 1.65          | 1.65          |
| <i>lnreal</i>       | 2.47          | 2.30          | 2.35          | 2.43          |
| <i>lnis</i>         | 1.18          | 1.18          | 1.14          | 1.16          |
| <i>lnedu</i>        | 1.27          | 1.26          | 1.29          | 1.29          |

Table S3. VIF of variables for mechanism analysis

| Models               | (1)           | (2)           | (3)           | (4)           | (5)           | (6)           | (7)           | (8)           |
|----------------------|---------------|---------------|---------------|---------------|---------------|---------------|---------------|---------------|
|                      | Table 6&7-(1) | Table 6&7-(2) | Table 6&7-(3) | Table 6&7-(4) | Table 6&7-(5) | Table 6&7-(6) | Table 6&7-(7) | Table 6&7-(8) |
| <i>lnpollution</i>   |               | 1.23          |               | 1.32          |               | 1.29          |               | 1.40          |
| <i>lnpm25</i>        |               |               | 1.30          | 1.33          |               |               | 1.35          | 1.37          |
| <i>lnwater</i>       | 1.87          |               |               |               | 1.87          |               |               |               |
| <i>lnso2</i>         | 1.76          |               |               |               | 1.77          |               |               |               |
| <i>lnsmog</i>        | 1.75          |               |               |               | 1.76          |               |               |               |
| <i>lnhealth_d</i>    | 1.08          | 1.07          | 1.07          | 1.08          |               |               |               |               |
| <i>lnhealth_cost</i> |               |               |               |               | 3.01          | 2.97          | 2.90          | 3.11          |
| <i>lnurban_r</i>     | 1.30          | 1.26          | 1.33          | 1.33          | 1.38          | 1.34          | 1.41          | 1.43          |
| <i>fiscgap</i>       | 1.10          | 1.09          | 1.07          | 1.07          | 1.15          | 1.14          | 1.12          | 1.13          |
| <i>lnprod_labor</i>  | 6.74          | 6.74          | 6.78          | 6.82          | 6.85          | 6.84          | 6.84          | 6.92          |
| <i>lnprod_land</i>   | 3.12          | 3.02          | 3.17          | 3.19          | 3.55          | 3.46          | 3.65          | 3.66          |
| <i>lnwage</i>        | 5.87          | 5.86          | 5.54          | 5.68          | 6.05          | 6.03          | 5.60          | 5.81          |
| <i>lnmedi</i>        | 1.90          | 1.88          | 2.10          | 2.14          | 1.92          | 1.90          | 2.08          | 2.15          |
| <i>lnroad</i>        | 1.57          | 1.57          | 1.70          | 1.70          | 1.55          | 1.54          | 1.66          | 1.66          |
| <i>lnreal</i>        | 2.48          | 2.30          | 2.35          | 2.43          | 2.84          | 2.69          | 2.69          | 2.71          |
| <i>lnis</i>          | 1.18          | 1.18          | 1.14          | 1.16          | 1.25          | 1.24          | 1.19          | 1.23          |

|              |      |      |      |      |      |      |      |      |
|--------------|------|------|------|------|------|------|------|------|
| <i>lnedu</i> | 1.27 | 1.27 | 1.30 | 1.30 | 1.29 | 1.29 | 1.33 | 1.33 |
|--------------|------|------|------|------|------|------|------|------|

---

When the VIF value is greater than 10, the set is often deemed to have collinear problems [90]. In this sense, results in Tables S2 and S3 indicate that there is no significant multicollinearity issue, which warrant the reliability of the empirical analysis.
